# Supplementary material for: Liquid-Based Iterative Recombineering Method Tolerant to Counter-Selection Escapes
Source: PubMed Central journal article supplement (PMC4361647; doi:10.1371/journal.pone.0119818), 2015-03-16
Supplement: pone.0119818.s004.pdf [file pone.0119818.s004.pdf]

**Table S1. List of primers used for the experiments in this work.**

| No  | sequence (5'-3')                                                       | notes                                                                                                        | template DNA                        |
|-----|------------------------------------------------------------------------|--------------------------------------------------------------------------------------------------------------|-------------------------------------|
| P1  | gattcattaatgcagctggcagc                                                | Amplification of HC cassette with <i>lacZ</i> homology                                                       | pMW- <i>hsvtk-cat</i>               |
| P2  | ttatTTTTgacaccagaccaactggtaatggtag<br>cgaccgtgtactgagagtgcaaatatgttacg |                                                                                                              |                                     |
| P3  | cgatggcggagctgaattac                                                   | Amplification of <i>lacZ</i> from MG1655 ( <b>Figure 3</b> )                                                 | genomic DNA (MG1655)                |
| P4  | gattaatgatcagtggcgcaagaac                                              |                                                                                                              |                                     |
| P5  | cctaacagcaccaggatttaaggtgaaattaat<br>ctttcatcatacacgagcttcatgcatcg     | Amplification of HK/HKH cassette with <i>yiiDE</i> locus homology ( <b>Figures 5</b> )                       | pHK, pHKH or pJ204- <i>pT5-mrfp</i> |
| P6  | ctgatggagagggggcgggtgctgcctctctcatt<br>caggtcactggcgatgctgtcggaaac     |                                                                                                              |                                     |
| P7  | atgaccatgattacggattcactggccgctgttt<br>tacaacgagattacgcgcagaccacc       | Amplification of HK/HKH cassette with <i>lacZ</i> locus homology ( <b>Figures 4, 5</b> )                     |                                     |
| P8  | ttatTTTTgacaccagaccaactggtaatggtag<br>cgaccgcgcccttaggtacgaactc        |                                                                                                              |                                     |
| P9  | cactaccgcagcagggaaataattcccgccca<br>aatagcttgagattacgcgcagaccacc       | Amplification of HK, HKH or <i>pT5-mrfp</i> cassette with <i>proV</i> locus homology ( <b>Figures 4, 5</b> ) |                                     |
| P10 | actgtccgccgctggcgtggtatcccacggatt<br>atTTTgacgcccttaggtacgaactc        |                                                                                                              |                                     |
| P11 | agcatgccactattgagtaaagccagtcaggg<br>gagagaacgattacgcgcagaccacctg       | Amplification of HK/HKH cassette with <i>rssB</i> locus homology ( <b>Figures 5</b> )                        |                                     |
| P12 | cattagcaggtaatgcaatttagcccgcgttat<br>cgTTTgcgcccttaggtacgaactc         | Amplification of HK/HKH cassette with <i>rssB</i> locus homology ( <b>Figures 5</b> )                        |                                     |

|     |                                                                            |                                                                                                        |                         |  |
|-----|----------------------------------------------------------------------------|--------------------------------------------------------------------------------------------------------|-------------------------|--|
| P13 | ctttacactttatgcttccggetc                                                   | Amplification of $p_L-gfp^{mut3.1}$<br>cassette with <i>lacZ</i> locus<br>homology ( <b>Figure 4</b> ) | pUC- $p_L-gfp^{mut3.1}$ |  |
| P14 | gacaccagaccaactggaatgcatcagagca<br>gattgtactgagag                          |                                                                                                        |                         |  |
| P15 | cattaccagttggtctggtgtcaaaaataataat                                         |                                                                                                        | Genomic DNA             |  |
| P16 | gagccggaagcataaagtgtaaag                                                   |                                                                                                        |                         |  |
| P17 | cgatggcggagctgaattac                                                       |                                                                                                        |                         |  |
| P18 | gattaatgatcagtggcgcaaagaac                                                 |                                                                                                        |                         |  |
| P19 | cctaacagcaccaggatttaaggtgaaattaat<br>ctttcatgagatctcgatcccgcgaaattaatac    | Amplification of $p_{T7}-mrfp$<br>cassette with <i>yjiDE</i> locus<br>homology ( <b>Figure 5</b> )     | pET23d- <i>mrfp</i>     |  |
| P20 | ctgatggagagggcggtgctgcctctctcatt<br>caggtcaccattcgccattcagcaaaaaac         |                                                                                                        |                         |  |
| P21 | actgtccgccgctggcgtggtatcccacggatt<br>atthtgagatcccgcgaaattaatacgaactcac    | Amplification of $p_{T7}-mrfp$<br>cassette with <i>proV</i> locus<br>homology ( <b>Figure 5</b> )      |                         |  |
| P22 | cactaccgcagcagggaaataattcccgcca<br>aatagcttccattcgccattcagcaaaaaac         |                                                                                                        |                         |  |
| P23 | ttatthttgacaccagaccaactggaatggtag<br>cgaccggagatctcgatcccgcgaaattaata<br>c | Amplification of $p_{T7}-mrfp$<br>cassette with <i>lacZ</i> locus<br>homology ( <b>Figure 5</b> )      |                         |  |
| P24 | atgacatgattacggattcactggccgctgtht<br>tacaacccattcgccattcagcaaaaaac         |                                                                                                        |                         |  |
| P25 | cattagcaggaatgcaaatttagcccgcgtht<br>cgthtgcctcaacgacaggagcac               | Amplification of $p_{T7}-mrfp$<br>cassette with <i>rssB</i> locus<br>homology ( <b>Figure 5</b> )      |                         |  |
| P26 | agcatgccactattgagtaaagccagtcaggg<br>gagagaacgtccattcgccattcagc             |                                                                                                        |                         |  |
| P27 | gtgthtgaaggcacgtatctgtht                                                   | <i>yjiDE</i> test primers                                                                              |                         |  |

|     |                                   |                                            |
|-----|-----------------------------------|--------------------------------------------|
| P28 | ctgaacagtgatgtagcaagacacg         | <i>yiiDE</i> test primers                  |
| P29 | atggttagttatcgcccaggatg           |                                            |
| P30 | cagcggttggaataatagcgag            | <i>lacZ</i> locus sequence/test primer     |
| P31 | gaagaaggcacatggctgaatatcg         |                                            |
| P32 | ggatacgacgataccgaagacag           |                                            |
| P33 | gattcattaatgcagctggcacg           |                                            |
| P34 | gaagagagtcaattcagggtgg            |                                            |
| P35 | ctggaagacgggacggaaatg             | <i>proV</i> test primers                   |
| P36 | gcgcgcttagatcgtgagg               |                                            |
| P37 | caacggggataacggctttttgac          | <i>rssB</i> test primers                   |
| P38 | ggcaatgccaatatggggaac             |                                            |
| P39 | cggttcaaagcatagcttaaacacc         | <i>mrfp</i> test primers                   |
| P40 | gggaaggacagtttcaggtagtc           |                                            |
| P41 | cgtctttatcctggattacgaccaatc       | <i>hsvtk</i> test primers                  |
| P42 | gtgcaaataaatttaagggttaagtttccgatg | <i>gfp<sup>mut3.1</sup></i> test primers   |
| P43 | gtcggcttgacaaaaagaaccg            | <i>Km<sup>r</sup></i> gene sequence primer |
| P44 | ctgccgtaccgctcagttgac             | <i>hsvtk<sub>mod</sub></i> sequence primer |
