# Supplementary material for: Liquid-Based Iterative Recombineering Method Tolerant to Counter-Selection Escapes
Source: PubMed Central journal article supplement (PMC4361647; doi:10.1371/journal.pone.0119818), 2015-03-16
Supplement: pone.0119818.s005.pdf [file pone.0119818.s005.pdf]

**Table S2. Sequence analysis of the *hsvtk* gene from dP-resistant clones that arose after the first step of recombination.**

Out of the 92 transformants (chloramphenicol-resistant clones isolated from the pool of MG1655 electroporated with HC cassette), we found three dP-resistant clones. The cassette inserted on chromosome was PCR-amplified using primer P30 and P32 (Table S1) for the sequence analysis.

| Clone number | Nucleoside substitution | Amino Acid substitution |
|--------------|-------------------------|-------------------------|
| 1            | G599A                   | R200D                   |
| 2            | C123T, G647A            | R216H                   |
| 3            | C391T                   | P131S                   |
