# Supplementary material for: Liquid-Based Iterative Recombineering Method Tolerant to Counter-Selection Escapes
Source: PubMed Central journal article supplement (PMC4361647; doi:10.1371/journal.pone.0119818), 2015-03-16
Supplement: pone.0119818.s006.pdf [file pone.0119818.s006.pdf]

**Table S3. Frequency of dP-resistant clones in MG1655 $\Delta$ lacZ::hsvtk-cat created by HC cassette PCR-amplified using different polymerases.**

The HC cassette was amplified with either Vent<sub>R</sub><sup>®</sup> DNA polymerase or Phusion<sup>®</sup> DNA polymerase ((New England Biolabs) using primer P1 and P2 (Table S1) to attach homology arms for targeting to the *lacZ* locus. The resultant DNA fragment was electroporated into *E.coli* strain MG1655 harboring pKD46 and plated onto an LB-Cm and LB-Cm/dP plate. The frequency of dP resistance (%) was calculated by:

| DNA polymerase type            | Frequency of dP-resistant clones [%] |
|--------------------------------|--------------------------------------|
| Phusion <sup>®</sup>           | 0.2 ± 0.1                            |
| Vent <sub>R</sub> <sup>®</sup> | 0.8 ± 0.3                            |

$100 \times [\text{number of colonies observed on Cm/dP plates}] / [\text{number of colonies on the Cm plate}]$

The numbers show the average of 3 samples with standard deviations.
