# Supplementary material for: Liquid-Based Iterative Recombineering Method Tolerant to Counter-Selection Escapes
Source: PubMed Central journal article supplement (PMC4361647; doi:10.1371/journal.pone.0119818), 2015-03-16
Supplement: pone.0119818.s007.pdf [file pone.0119818.s007.pdf]

**Table S4. Genotype summary of non-fluorescent clones found in the first round of recombineering.**

From the first round of two-step recombination using the HK cassette (Table 2), nine clones with no GFP<sup>mut3.1</sup> fluorescence were individually picked and their *lacZ* (or  $\Delta lacZ::hsvTK-km^r$ ) locus was sequenced. For the sequence of primers used for PCR amplification and sequencing (primers P30, 33, P43, and P44), see Table S1.

| clone number | HK cassette | genotype                                             |
|--------------|-------------|------------------------------------------------------|
| 1            | No          | mutation in <i>gfp</i> <sup>mut3.1</sup> (E205 stop) |
| 2            | Yes         | mutation in <i>hsvtk</i> (D228A)                     |
| 3            | Yes         | mutation in <i>hsvtk</i> (D228A)                     |
| 4            | Yes         | mutation in <i>hsvtk</i> (D228A)                     |
| 5            | Yes         | mutation in <i>hsvtk</i> (T158P)                     |
| 6            | Yes         | <i>hsvtk</i> missing                                 |
| 7            | Yes         | <i>hsvtk</i> missing                                 |
| 8            | Yes         | <i>hsvtk</i> missing                                 |
| 9            | No          | No PCR product                                       |
