# Supplementary material for: Liquid-Based Iterative Recombineering Method Tolerant to Counter-Selection Escapes
Source: PubMed Central journal article supplement (PMC4361647; doi:10.1371/journal.pone.0119818), 2015-03-16
Supplement: pone.0119818.s008.pdf [file pone.0119818.s008.pdf]

**Table S5. Sequencing of the *hsvtk* regions of the counter-selection escapees arose from dP sensitive strain MG1655 $\Delta$ *lacZ::hsvTK-km'*.**

dP sensitive clone was cultured overnight and plated on dP-selection plate from which nine clones were picked, and sequenced their *hsvtk* coding regions.

| Clone number | Nucleoside substitution                                           | Amino Acid substitution                       |
|--------------|-------------------------------------------------------------------|-----------------------------------------------|
| 1            | T865C                                                             | F289L                                         |
| 2            | A472C                                                             | T158P                                         |
| 3            | A472C                                                             | T158P                                         |
| 4            | <sup>865</sup> TTCACCCTG --> <sup>865</sup> TTCACCCTG - TTCACCCTG | <sup>289</sup> FTL --> <sup>289</sup> FTL-FTL |
| 5            | A196C                                                             | T66P                                          |
| 6            | A164C                                                             | D55A                                          |
| 7            | <sup>865</sup> TTCACCCTG --> <sup>865</sup> TTCACCCTG - TTCACCCTG | <sup>289</sup> FTL --> <sup>289</sup> FTL-FTL |
| 8            | A683C                                                             | D228A                                         |
| 9            | A196C                                                             | T66P                                          |
